# Supplementary material for: A possible unaccounted source of nitrogen-containing compound formation in aerosols: amines reacting with secondary ozonides
Source: Copernicus journal article supplement (doi:10.5194/acp-24-155-2024), 2024-01-05
Supplement: Supplementary file 1 [file acp-24-155-2024-supplement.pdf]

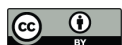

*Supplement of*

## **A possible unaccounted source of nitrogen-containing compound formation in aerosols: amines reacting with secondary ozonides**

**Junting Qiu et al.**

*Correspondence to:* Taicheng An (antc99@gdut.edu.cn)

The copyright of individual parts of the supplement might differ from the article licence.

# Supplement

## Schemes

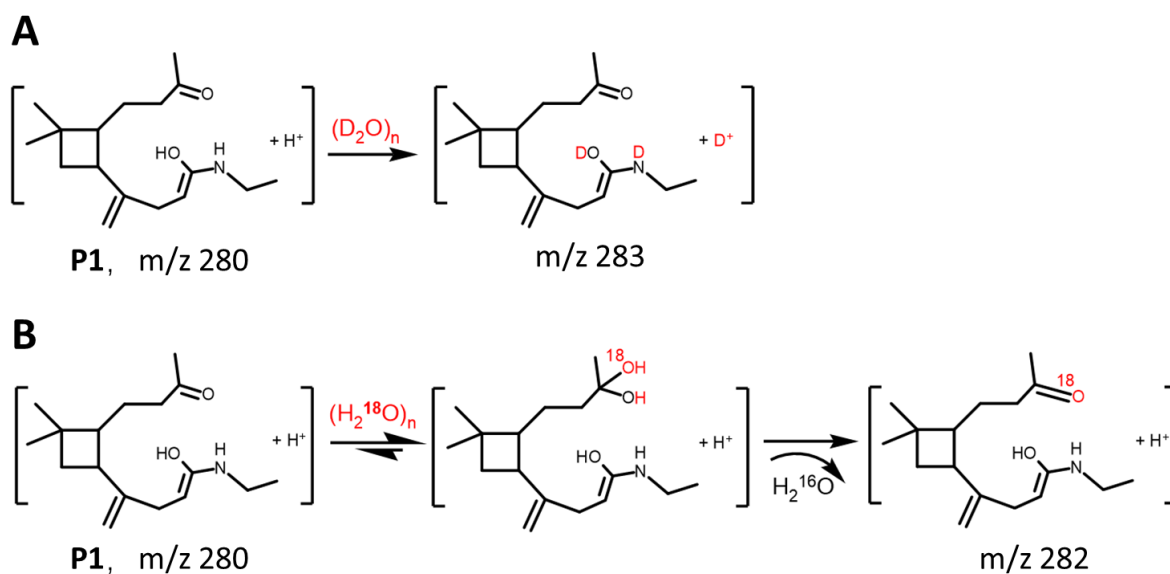

**Scheme S1** (A) H-atom and D-atom exchange between P1 and D<sub>2</sub>O in AN/D<sub>2</sub>O solution. (B) O-atom exchange between P1 and H<sub>2</sub><sup>18</sup>O in AN/H<sub>2</sub><sup>18</sup>O solution.

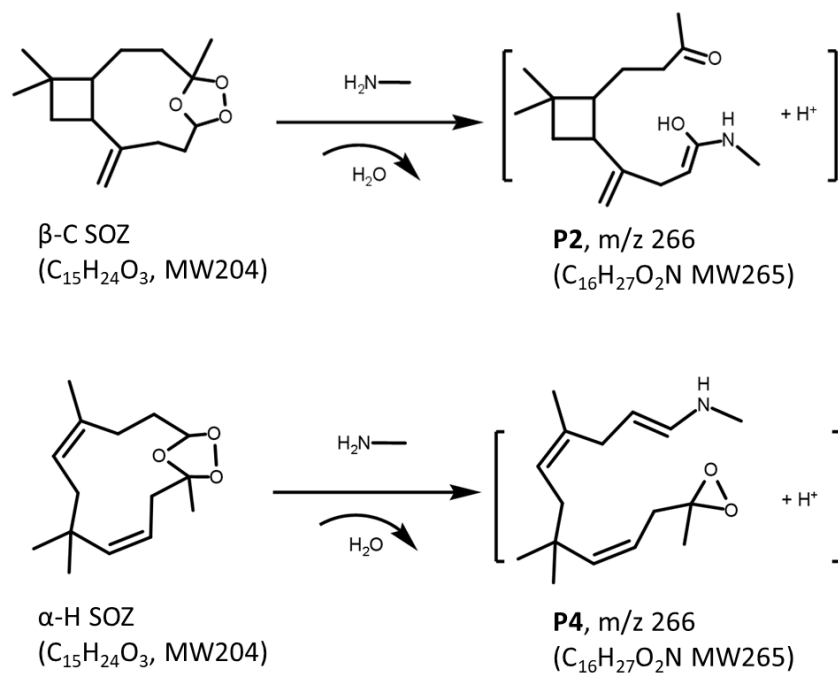

**Scheme S2** Possible structures of P2 and P4 generated from the reactions of  $\beta$ -C SOZ and  $\alpha$ -H SOZ with MA

## Figures

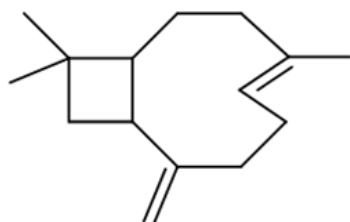

**$\beta$ -caryophyllene**  
**(C<sub>15</sub>H<sub>24</sub>, MW204)**

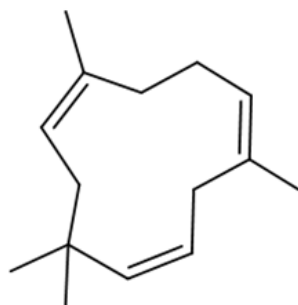

**$\alpha$ -humulene**  
**(C<sub>15</sub>H<sub>24</sub>, MW204)**

**Figure S1** Chemical structures of  $\beta$ -caryophyllene and  $\alpha$ -humulene

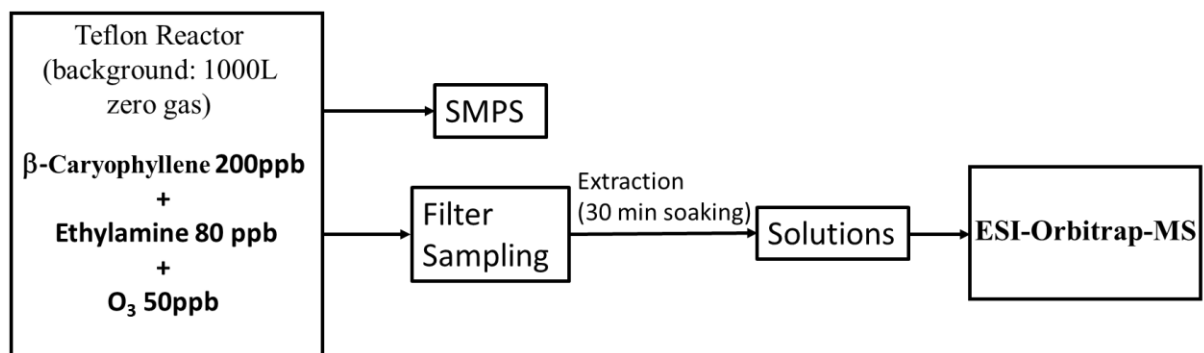

**Figure S2** Schematic setup and procedure used in this work

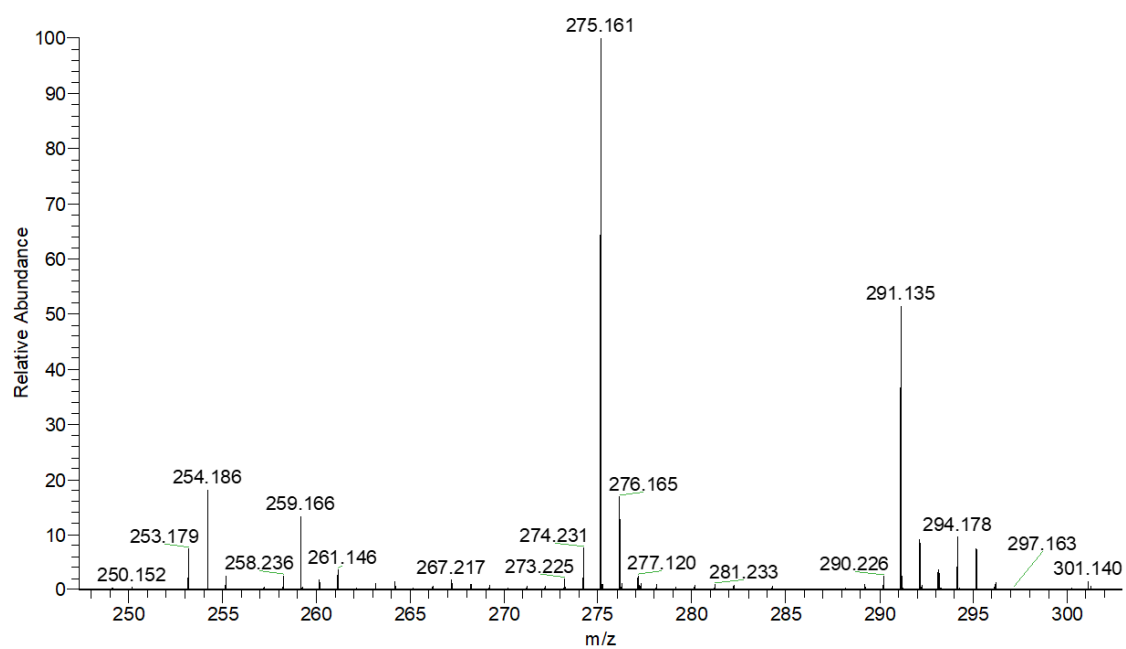

**Figure S3** High-resolution positive-ion ESI mass spectra of the degradation products extracted in AN/D<sub>2</sub>O (vol/vol = 4/1) from  $\beta$ -C reacting with O<sub>3</sub>.

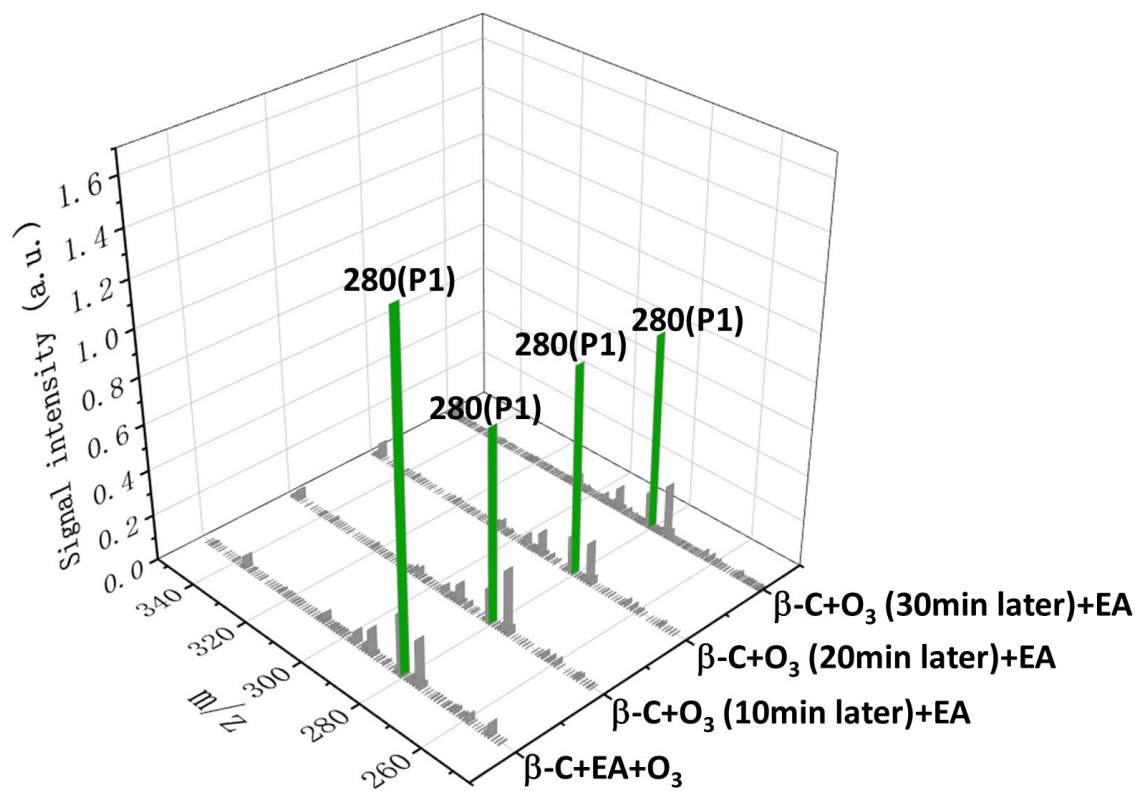

**Figure S4** Positive-ion ESI mass spectra of the products extracted in AN/W (vol/vol = 4/1) from ozonolysis of  $\beta\text{-C}$  in addition of EA at different timings

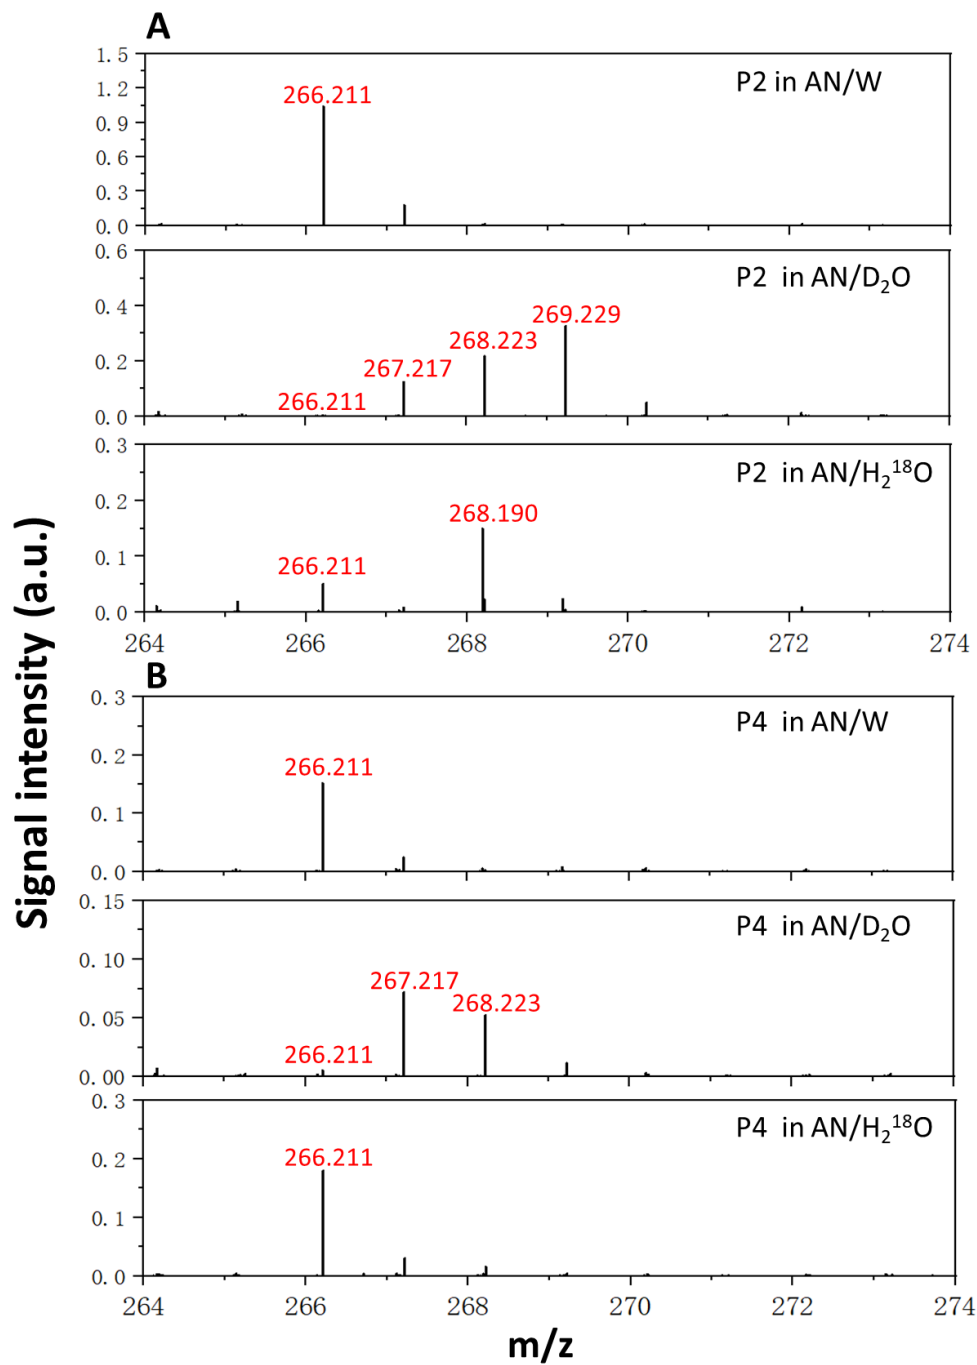

**Figure S5** High-resolution positive-ion ESI mass spectra of (A) P2 and (B) P4 extracted in AN/W (vol/vol = 4/1), AN/D<sub>2</sub>O (vol/vol = 4/1) and AN/H<sub>2</sub><sup>18</sup>O (vol/vol = 4/1) solutions
